# Supplementary material
Source: PubMed Central journal article supplement (PMC6832074)
Supplement: JB.00365-19-s0001.pdf [file JB.00365-19-s0001.pdf]

## **Supplemental Figures and Tables**

### **Chromosomal recombination targets in *Chlamydia* interspecies lateral gene transfer**

Robert J. Suchland, Steven J. Carrell, Yibing Wang, Kevin Hybiske, Debbie B. Kim, Zoe E. Dimond, P. Scott Hefty, and Daniel D. Rockey

Published in the Journal of Bacteriology, 2019

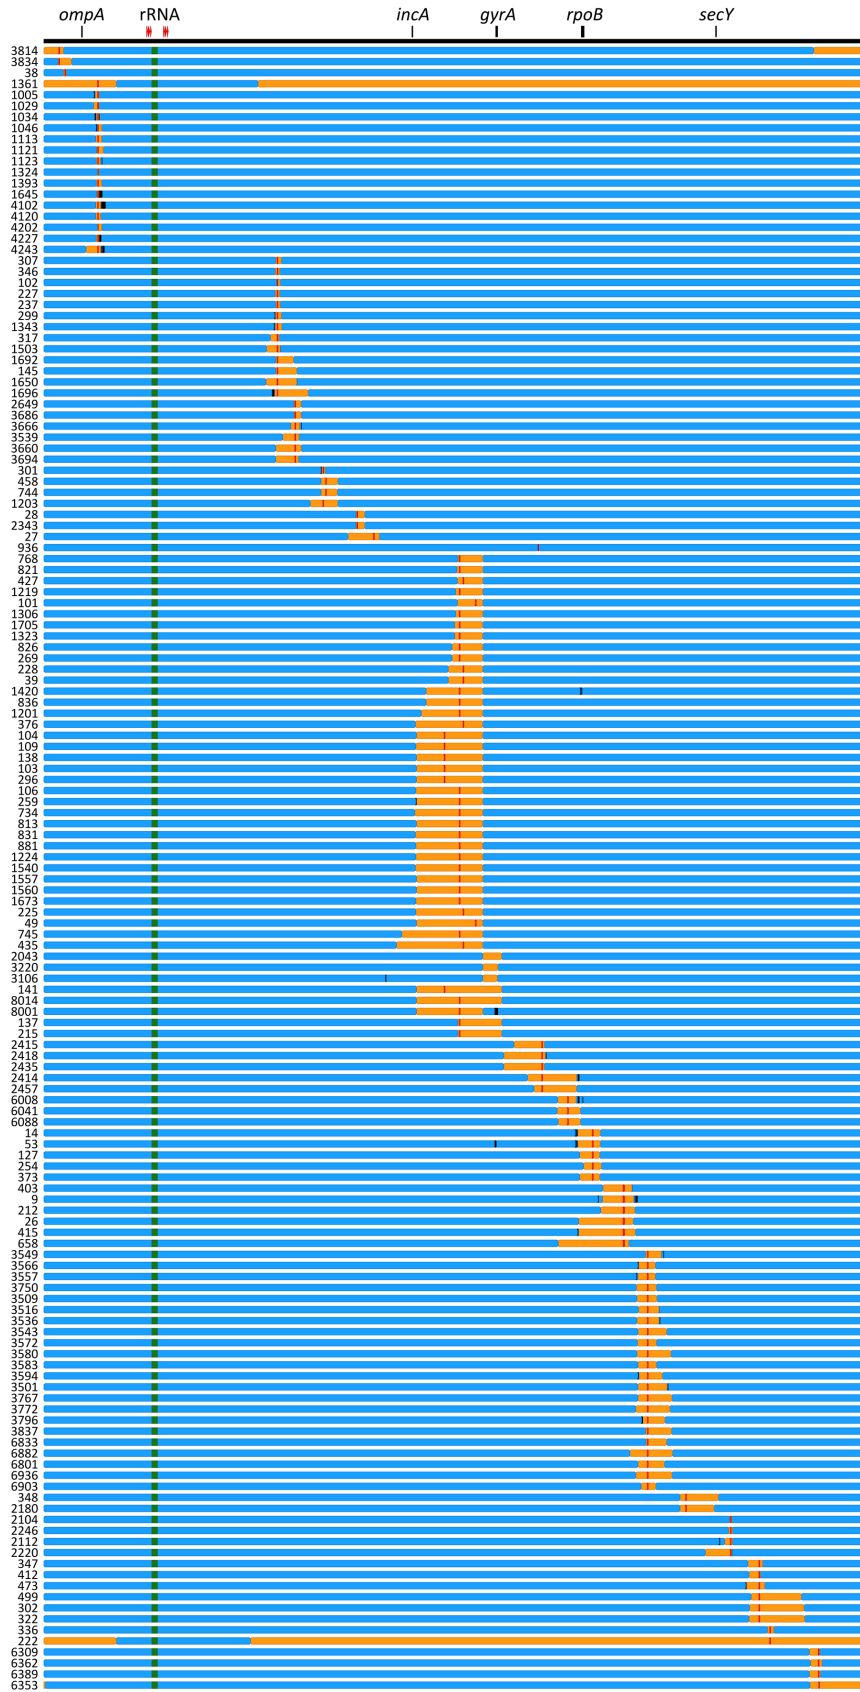

(Previous page)

**Figure S1. Graphic representation of the independent recombinant strains generated in this work.** Individual recombinants are identified by number at the left of each line. The specific recombination endpoints, transposon parents, and genome accession numbers for each recombinant in this figure can be examined in Table S1. *C. trachomatis* sequence is indicated in blue, while *C. muridarum* sequence is indicated in tan. The vertical red bars indicate the location of the transposon in each strain, black bars indicate regions of secondary recombination in individual progeny strains, and the location of *tet(C)* is shown in green for each recombinant. The location of selected chromosomal genes are indicated at the top of the figure.

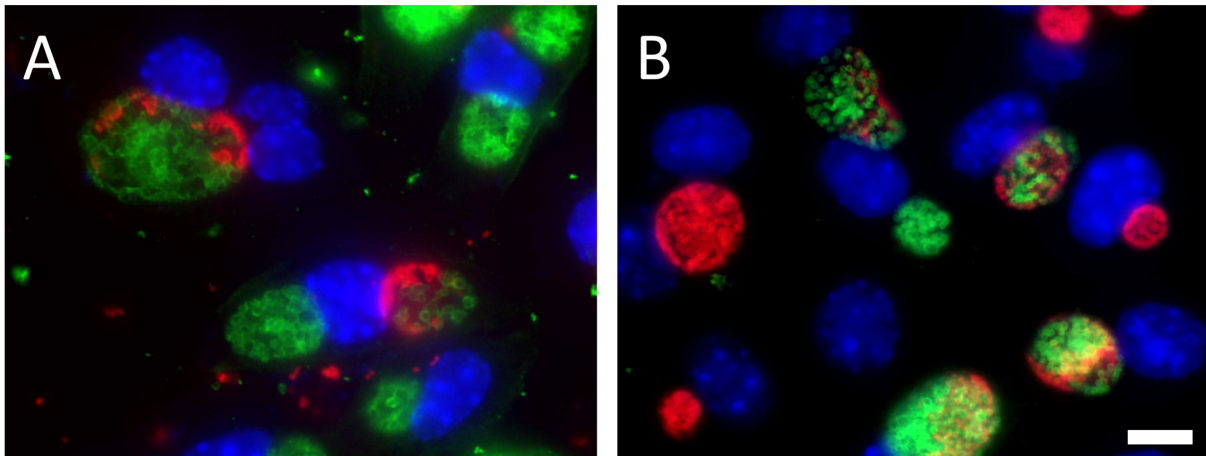

**Figure S2.** Fusion of inclusions by different recombinant strains. Panel A: Coinfection of McCoy cells with *C. trachomatis* strain DUW/3 and recombinant strain RC435, which encodes *C. muridarum* IncA. Panel B: Coinfection of McCoy cells with *C. trachomatis* strain DUW/3 and merodiploid recombinant strain RC1201, which encodes IncA from both *C. trachomatis* and *C. muridarum*. Monolayers of cells were infected for 20h (panel A) or 24h (panel B) followed by methanol-fixation and labeling with serovar-specific anti-MOMP monoclonal antibodies. In both images, wild-type parental strain DUW/3 is labeled green and recombinants expressing serovar L2 MOMP are labeled red. Each host cell nuclei is labeled blue with DAPI. The scale bar in panel A indicates 10 microns for both panels.

**Table S1. Chromosomal recombination targets in Chlamydia interspecies lateral gene transfer.**

Strain names, as used in the manuscript, are listed in column A.

| Clone number | MUTANT ID                         | Accession | Date of record | CT Parent | CM Parent | Antibiotics | Left margin | Locus tag of Tn   | Right margin | Insertion length | 2° recomb? | 2° Left Margin | 2° Right Margin | 2° Length |
|--------------|-----------------------------------|-----------|----------------|-----------|-----------|-------------|-------------|-------------------|--------------|------------------|------------|----------------|-----------------|-----------|
| RC3106       | KU3106                            | CP042702  |                | L2/tet9   |           | Tet/Ofi     | 494372      |                   | 521141       | 26769            | Yes        | 437244         | 437958          | 714       |
| RC38         | TC0031::TnxL2/rifR-38             | CP042736  | 10/14/16       | L2/74     | UWCM004   | Cam/Rif     | 34027       | TC0031            |              | 37662            | Yes        | 37859          | 38615           | 757       |
| RC1005       | TC0080-IGR-TC0081::TnL2/tetR-1005 | CP042735  | 2/5/18         | L2/tet9   | UWCM020   | Cam/Tet     | 89559       | TC0080-IGR-TC0081 | 96574        | 7015             | Yes        | 88427          | 89555           | 1129      |
| RC1034       | TC0080-IGR-TC0081::TnL2/tetR-1034 | CP042732  | 2/5/18         | L2/tet9   | UWCM020   | Cam/Tet     | 92728       | TC0080-IGR-TC0081 | 96830        | 4102             | Yes        | 97285          | 98489           | 1205      |
| RC1123       | TC0080-IGR-TC0081::TnL2/tetR-1123 | CP042728  | 2/5/18         | L2/tet9   | UWCM020   | Cam/Tet     | 92124       | TC0080-IGR-TC0081 | 99879        | 7755             | Yes        | 102641         | 102816          | 176       |
| RC1645       | TC0080-IGR-TC0081::TnL2/tetR-1645 | CP042720  | 6/13/18        | L2/tet9   | UWCM020   | Cam/Tet     | 93120       | TC0080-IGR-TC0081 | 96582        | 3462             | Yes        | 96620          | 103694          | 7075      |
| RC4102       | TC0080-IGR-TC0081::TnL2/tetR-4102 | CP042675  | 6/13/18        | L2/tet9   | UWCM020   | Cam/Tet     | 91247       | TC0080-IGR-TC0081 | 100238       | 8991             | Yes        | 101655         | 109659          | 8005      |
| RC4227       | TC0080-IGR-TC0081::TnL2/tetR-4227 | CP042671  | 6/13/18        | L2/tet9   | UWCM020   | Cam/Tet     | 92729       | TC0080-IGR-TC0081 | 96724        | 3995             | Yes        | 97233          | 101875          | 4643      |
| RC4243       | TC0080-IGR-TC0081::TnL2/tetR-4243 | CP042670  | 6/13/18        | L2/tet9   | UWCM020   | Cam/Tet     | 73182       | TC0080-IGR-TC0081 | 100694       | 27512            | Yes        | 100702         | 102686          | 1985      |
| RC1343       | TC0189::TnL2/tetR-1343            | CP042725  | 6/13/18        | L2/tet9   | UWCM009   | Cam/Tet     | 233414      | TC0189            | 246030       | 12616            | Yes        | 232533         | 233343          | 811       |
| RC1503       | TC0189::TnL2/tetR-1503            | CP042721  | 6/13/18        | L2/tet9   | UWCM009   | Cam/Tet     | 218150      | TC0189            | 242639       | 24489            | Yes        | 242938         | 243656          | 719       |
| RC1650       | TC0189::TnL2/tetR-1650            | CP042719  | 6/13/18        | L2/tet9   | UWCM009   | Cam/Tet     | 217573      | TC0189            | 241532       | 53959            | Yes        | 217837         | 217890          | 54        |
| RC1696       | TC0189::TnL2/tetR-1696            | CP042781  | 6/13/18        | L2/tet9   | UWCM009   | Cam/Tet     | 233367      | TC0189            | 292867       | 59500            | Yes        | 228391         | 231892          | 3502      |
| RC299        | TC0189::TnL2/tetR-299             | CP042706  | 6/13/18        | L2/tet9   | UWCM009   | Cam/Tet     | 233764      | TC0189            | 245180       | 11416            | Yes        | 232854         | 233477          | 624       |
| RC3666       | TC0212::TnL2/tetR-3666            | CP042682  | 6/13/18        | L2/tet9   | UWCM026   | Cam/Tet     | 261160      | TC0212            | 277021       | 15861            | Yes        | 279944         | 280024          | 81        |
| RC301        | TC0257::TnxL2/tetR-301            | CP042705  | 2/14/17        | L2/tet9   | UWCM027   | Cam/Tet     | 316052      | TC0257            | 321325       | 5273             | Yes        | 315152         | 315258          | 107       |
| RC1420       | TC0431::TnxL2/tetR-1420           | CP042786  | 8/3/17         | L2/tet9   | UWCM007   | Cam/Tet     | 483049      | TC0431            | 555903       | 72854            | Yes        | 722759         | 723135          | 377       |
| RC259        | TC0431::TnxL2/tetR-259            | CP042768  | 2/14/17        | L2/tet9   | UWCM007   | Cam/Tet     | 480512      | TC0431            | 555904       | 75392            | Yes        | 479828         | 479834          | 7         |
| RC2414       | TC0530::TnL2/tetR-2414            | CP042773  | 9/25/18        | L2/tet9   | UWCM030   | Cam/Tet     | 529539      | TC0530            | 615682       | 86143            | Yes        | 618318         | 621259          | 2942      |
| RC2418       | TC0530::TnL2/tetR-2418            | CP042771  | 9/25/18        | L2/tet9   | UWCM030   | Cam/Tet     | 525682      | TC0530            | 599059       | 73377            | Yes        | 599064         | 600589          | 1526      |
| RC6008       | TC0575::TnL2/tetR-6008            | CP042665  | 6/13/18        | L2/tet9   | UWCM011   | Cam/Tet     | 653181      | TC0575            | 687727       | 34546            | Yes        | 701618         | 701714          | 97        |
| RC403        | TC0657::TnxL2/tetR-403            | CP042757  | 12/8/16        | L2/tet9   | UWCM002   | Cam/Tet     | 629290      | TC0657            | 746075       | 53145            | Yes        | 746133         | 746154          | 22        |
| RC415        | TC0657::TnxL2/tetR-415            | CP042756  | 12/8/16        | L2/tet9   | UWCM002   | Cam/Tet     | 653147      | TC0657            | 755953       | 102806           | Yes        | 652859         | 653025          | 167       |
| RC9          | TC0657::TnxL2/tetR-9              | CP042746  | 12/8/16        | L2/tet9   | UWCM002   | Cam/Tet     | 691931      | TC0657            | 749858       | 57927            | Yes        | 753801         | 756137          | 2337      |
| RC3501       | TC0693::TnL2/tetR-3501            | CP042694  | 6/13/18        | L2/tet9   | UWCM012   | Cam/Tet     | 755693      | TC0693            | 806225       | 50532            | Yes        | 806763         | 807095          | 333       |
| RC3516       | TC0693::TnL2/tetR-3516            | CP042692  | 6/13/18        | L2/tet9   | UWCM012   | Cam/Tet     | 758170      | TC0693            | 793005       | 34835            | Yes        | 793174         | 793259          | 76        |
| RC3536       | TC0693::TnL2/tetR-3536            | CP042691  | 6/13/18        | L2/tet9   | UWCM012   | Cam/Tet     | 753916      | TC0693            | 792064       | 38148            | Yes        | 792521         | 792533          | 13        |
| RC3549       | TC0693::TnL2/tetR-3549            | CP042689  | 6/13/18        | L2/tet9   | UWCM012   | Cam/Tet     | 771153      | TC0693            | 797150       | 25997            | Yes        | 800286         | 800312          | 27        |
| RC3557       | TC0693::TnL2/tetR-3557            | CP042688  | 6/13/18        | L2/tet9   | UWCM012   | Cam/Tet     | 756123      | TC0693            | 785782       | 29659            | Yes        | 753017         | 753146          | 130       |
| RC3566       | TC0693::TnL2/tetR-3566            | CP042687  | 6/13/18        | L2/tet9   | UWCM012   | Cam/Tet     | 755833      | TC0693            | 785783       | 29950            | Yes        | 750755         | 755797          | 43        |
| RC3594       | TC0693::TnL2/tetR-3594            | CP042684  | 6/13/18        | L2/tet9   | UWCM012   | Cam/Tet     | 756718      | TC0693            | 797246       | 40528            | Yes        | 755693         | 756709          | 1017      |
| RC3796       | TC0693::TnL2/tetR-3796            | CP042760  | 6/13/18        | L2/tet9   | UWCM012   | Cam/Tet     | 763928      | TC0693            | 801689       | 37761            | Yes        | 762851         | 762683          | 103       |
| RC2112       | TC0828::TnL2/tetR-2112            | CP042715  | 9/25/18        | L2/tet9   | UWCM032   | Cam/Tet     | 893768      | TC0828            | 906344       | 12576            | Yes        | 885201         | 885505          | 305       |
| RC2220       | TC0828::TnL2/tetR-2220            | CP042776  | 9/25/18        | L2/tet9   | UWCM032   | Cam/Tet     | 863118      | TC0828            | 904899       | 41781            | Yes        | 905032         | 905316          | 285       |
| RC473        | TC0865-IGR-TC0866::TnL2/tetR-473  | CP042668  | 11/14/17       | L2/tet9   | UWCM023   | Cam/Tet     | 924275      | TC0865-IGR-TC0866 | 953505       | 29230            | Yes        | 923514         | 923523          | 10        |
| RC2043       | KU2043                            | CP042717  |                | L2/tet9   |           | Tet/Ofi     | 494372      |                   |              | 529022           | 34650      | No             |                 |           |
| RC141        | KU2043c104-141                    | CP042787  | 6/13/18        | RC104     | KU2043    | Cam/Tet/Ofi | 480472      | TC0411            |              | 590523           | 110051     | No             |                 |           |
| RC8001       | KU2043c259-8001                   | CP042743  | 6/13/18        | RC259     | KU2043    | Cam/Tet/Ofi | 480472      | TC0431            |              | 555904           | 75432      | No             |                 |           |
| RC8014       | KU2043c259-8014                   | CP042742  | 6/13/18        | RC259     | KU2043    | Cam/Tet/Ofi | 480472      | TC0431            |              | 590523           | 110051     | No             |                 |           |
| RC137        | KU2043c768-137                    | CP042789  | 10/16/18       | RC768     | KU2043    | Cam/Tet/Ofi | 478310      | TC0431            |              | 555298           | 76988      | No             |                 |           |
| RC215        | KU2043c768-215                    | CP042778  | 10/16/18       | RC768     | KU2043    | Cam/Tet/Ofi | 478338      | TC0431            |              | 555326           | 76988      | No             |                 |           |
| RC3220       | KU3220                            | CP042699  |                | L2/tet9   |           | Tet/Ofi     | 494372      |                   |              | 522242           | 27870      | No             |                 |           |
| RC3814       | TC0019-IGR-TC0020::TnL2/tetR-3814 | CP042677  | 6/13/18        | L2/tet9   | UWCM021   | Cam/Tet     | 1010324     | TC0019-IGR-TC0020 | 1026515      | 35595            | No         |                |                 |           |
| RC3834       | TC0019-IGR-TC0020::TnL2/tetR-3834 | CP042676  | 6/13/18        | L2/tet9   | UWCM021   | Cam/Tet     | 25878       | TC0019-IGR-TC0020 | 48478        | 22600            | No         |                |                 |           |
| RC1029       | TC0080-IGR-TC0081::TnL2/tetR-1029 | CP042733  | 2/5/18         | L2/tet9   | UWCM020   | Cam/Tet     | 87906       | TC0080-IGR-TC0081 | 97571        | 9665             | No         |                |                 |           |
| RC1046       | TC0080-IGR-TC0081::TnL2/tetR-1046 | CP042731  | 2/5/18         | L2/tet9   | UWCM020   | Cam/Tet     | 93069       | TC0080-IGR-TC0081 | 102797       | 9728             | No         |                |                 |           |
| RC1113       | TC0080-IGR-TC0081::TnL2/tetR-1113 | CP042730  | 2/5/18         | L2/tet9   | UWCM020   | Cam/Tet     | 91646       | TC0080-IGR-TC0081 | 102060       | 10414            | No         |                |                 |           |
| RC1121       | TC0080-IGR-TC0081::TnL2/tetR-1121 | CP042729  | 2/5/18         | L2/tet9   | UWCM020   | Cam/Tet     | 93672       | TC0080-IGR-TC0081 | 105062       | 11390            | No         |                |                 |           |
| RC1324       | TC0080-IGR-TC0081::TnL2/tetR-1324 | CP042726  | 6/13/18        | L2/tet9   | UWCM020   | Cam/Tet     | 94393       | TC0080-IGR-TC0081 | 96951        | 2558             | No         |                |                 |           |
| RC1361       | TC0080-IGR-TC0081::TnL2/tetR-1361 | CP042790  | 6/13/18        | L2/tet9   | UWCM020   | Cam/Tet     | 203792      | TC0080-IGR-TC0081 | 1026361      | 75054            | No         |                |                 |           |
| RC1393       | TC0080-IGR-TC0081::TnL2/tetR-1393 | CP042724  | 6/13/18        | L2/tet9   | UWCM020   | Cam/Tet     | 92269       | TC0080-IGR-TC0081 | 102316       | 10047            | No         |                |                 |           |
| RC4120       | TC0080-IGR-TC0081::TnL2/tetR-4120 | CP042673  | 6/13/18        | L2/tet9   | UWCM020   | Cam/Tet     | 91022       | TC0080-IGR-TC0081 | 100028       | 9006             | No         |                |                 |           |
| RC4202       | TC0080-IGR-TC0081::TnL2/tetR-4202 | CP042672  | 6/13/18        | L2/tet9   | UWCM020   | Cam/Tet     | 94303       | TC0080-IGR-TC0081 | 102121       | 7818             | No         |                |                 |           |
| RC102        | TC0189::TnL2/tetR-102             | CP042734  | 2/5/18         | L2/tet9   | UWCM009   | Cam/Tet     | 238873      | TC0189            | 243173       | 4300             | No         |                |                 |           |
| RC145        | TC0189::TnL2/tetR-145             | CP042722  | 2/5/18         | L2/tet9   | UWCM009   | Cam/Tet     | 234602      | TC0189            | 271508       | 36906            | No         |                |                 |           |
| RC1692       | TC0189::TnL2/tetR-1692            | CP042718  | 6/13/18        | L2/tet9   | UWCM009   | Cam/Tet     | 235105      | TC0189            | 267429       | 32324            | No         |                |                 |           |
| RC227        | TC0189::TnL2/tetR-227             | CP042712  | 6/13/18        | L2/tet9   | UWCM009   | Cam/Tet     | 234463      | TC0189            | 242035       | 7572             | No         |                |                 |           |
| RC237        | TC0189::TnL2/tetR-237             | CP042710  | 6/13/18        | L2/tet9   | UWCM009   | Cam/Tet     | 234773      | TC0189            | 242728       | 7955             | No         |                |                 |           |
| RC307        | TC0189::TnL2/tetR-307             | CP042703  | 6/13/18        | L2/tet9   | UWCM009   | Cam/Tet     | 234874      | TC0189            | 244988       | 10114            | No         |                |                 |           |
| RC317        | TC0189::TnL2/tetR-317             | CP042701  | 6/13/18        | L2/tet9   | UWCM009   | Cam/Tet     | 224776      | TC0189            | 240582       | 15806            | No         |                |                 |           |
| RC346        | TC0189::TnL2/tetR-346             | CP042697  | 6/13/18        | L2/tet9   | UWCM009   | Cam/Tet     | 234463      | TC0189            | 242059       | 7596             | No         |                |                 |           |
| RC2649       | TC0212::TnL2/tetR-2649            | CP042708  | 6/13/18        | L2/tet9   | UWCM026   | Cam/Tet     | 266816      | TC0212            | 280319       | 13503            | No         |                |                 |           |
| RC3539       | TC0212::TnL2/tetR-3539            | CP042690  | 6/13/18        | L2/tet9   | UWCM026   | Cam/Tet     | 245712      | TC0212            | 276272       | 30560            | No         |                |                 |           |
| RC3660       | TC0212::TnL2/tetR-3660            | CP042683  | 6/13/18        | L2/tet9   | UWCM026   | Cam/Tet     | 235356      | TC0212            | 279531       | 44175            | No         |                |                 |           |
| RC3686       | TC0212::TnL2/tetR-3686            | CP042681  | 6/13/18        | L2/tet9   | UWCM026   | Cam/Tet     | 266816      | TC0212            | 280319       | 13503            | No         |                |                 |           |
| RC3694       | TC0212::TnL2/tetR-3694            | CP042680  | 6/13/18        | L2/tet9   | UWCM026   | Cam/Tet     | 235288      | TC0212            | 274300       | 38772            | No         |                |                 |           |
| RC1203       | TC0257::TnxL2/tetR-1203           | CP042795  | 2/14/17        | L2/tet9   | UWCM027   | Cam/Tet     | 294581      | TC0257            | 342708       | 48127            | No         |                |                 |           |
| RC458        | TC0259::TnxL2/tetR-458            | CP042669  | 12/8/16        | L2/tet9   | UWCM008   | Cam/Tet     | 314635      | TC0259            | 342877       | 28242            | No         |                |                 |           |
| RC           |                                   |           |                |           |           |             |             |                   |              |                  |            |                |                 |           |

Table S1, continued

| Clone number | MUTANT ID                          | Accession | Date of record | CT Parent | CM Parent | Antibiotics | Left margin | Locus tag of Tn     | Right margin | Insertion length | 2° recomb? | 2° Left Margin | 2° Right Margin | 2° Length |
|--------------|------------------------------------|-----------|----------------|-----------|-----------|-------------|-------------|---------------------|--------------|------------------|------------|----------------|-----------------|-----------|
| RC296        | TC0411::TnxD/tetR-296              | CP042800  | 6/13/18        | D/tet3    | UWCM003   | Cam/Tet     | 480453      | TC0411              | 555904       | 75451            | No         |                |                 |           |
| RC106        | TC0431::TnxD/tetR-106              | CP042801  | 6/13/18        | D/tet3    | UWCM007   | Cam/Tet     | 480148      | TC0431              | 555905       | 75757            | No         |                |                 |           |
| RC1201       | TC0431::TnxL2/tetR-1201            | CP042796  | 2/14/17        | L2/tet9   | UWCM007   | Cam/Tet     | 489804      | TC0431              | 571668       | 81864            | No         |                |                 |           |
| RC1219       | TC0431::TnxL2/tetR-1219            | CP042794  | 2/14/17        | L2/tet9   | UWCM007   | Cam/Tet     | 510371      | TC0431              | 556092       | 45721            | No         |                |                 |           |
| RC1224       | TC0431::TnxL2/tetR-1224            | CP042793  | 2/14/17        | L2/tet9   | UWCM007   | Cam/Tet     | 480069      | TC0431              | 555904       | 75835            | No         |                |                 |           |
| RC1306       | TC0431::TnxL2/tetR-1306            | CP042792  | 2/14/17        | L2/tet9   | UWCM007   | Cam/Tet     | 510371      | TC0431              | 556092       | 45721            | No         |                |                 |           |
| RC1323       | TC0431::TnxL2/tetR-1323            | CP042791  | 2/14/17        | L2/tet9   | UWCM007   | Cam/Tet     | 508546      | TC0431              | 556044       | 47498            | No         |                |                 |           |
| RC1540       | TC0431::TnxL2/tetR-1540            | CP042785  | 8/3/17         | L2/tet9   | UWCM007   | Cam/Tet     | 478266      | TC0431              | 555870       | 77604            | No         |                |                 |           |
| RC1557       | TC0431::TnxL2/tetR-1557            | CP042784  | 8/3/17         | L2/tet9   | UWCM007   | Cam/Tet     | 480343      | TC0431              | 555904       | 75561            | No         |                |                 |           |
| RC1560       | TC0431::TnxL2/tetR-1560            | CP042783  | 8/3/17         | L2/tet9   | UWCM007   | Cam/Tet     | 480472      | TC0431              | 555904       | 75432            | No         |                |                 |           |
| RC1673       | TC0431::TnxL2/tetR-1673            | CP042782  | 8/3/17         | L2/tet9   | UWCM007   | Cam/Tet     | 480037      | TC0431              | 555904       | 75867            | No         |                |                 |           |
| RC1705       | TC0431::TnxL2/tetR-1705            | CP042780  | 8/3/17         | L2/tet9   | UWCM007   | Cam/Tet     | 508112      | TC0431              | 556049       | 47937            | No         |                |                 |           |
| RC269        | TC0431::TnxL2/tetR-269             | CP042737  | 6/13/18        | L2/tet9   | UWCM007   | Cam/Tet     | 503661      | TC0431              | 556008       | 52347            | No         |                |                 |           |
| RC734        | TC0431::TnxL2/tetR-734             | CP042750  | 2/14/17        | L2/tet9   | UWCM007   | Cam/Tet     | 477802      | TC0431              | 555870       | 78068            | No         |                |                 |           |
| RC745        | TC0431::TnxL2/tetR-745             | CP042749  | 2/14/17        | L2/tet9   | UWCM007   | Cam/Tet     | 453653      | TC0431              | 555441       | 101788           | No         |                |                 |           |
| RC768        | TC0431::TnxL2/tetR-768             | CP042748  | 2/14/17        | L2/tet9   | UWCM007   | Cam/Tet     | 513736      | TC0431              | 556114       | 42378            | No         |                |                 |           |
| RC813        | TC0431::TnxL2/tetR-813             | CP042741  | 2/14/17        | L2/tet9   | UWCM007   | Cam/Tet     | 480460      | TC0431              | 555904       | 75444            | No         |                |                 |           |
| RC821        | TC0431::TnxL2/tetR-821             | CP042655  | 6/1/17         | L2/tet9   | UWCM007   | Cam/Tet     | 512348      | TC0431              | 556102       | 43754            | No         |                |                 |           |
| RC826        | TC0431::TnxL2/tetR-826             | CP042747  | 6/1/17         | L2/tet9   | UWCM007   | Cam/Tet     | 503661      | TC0431              | 556008       | 52347            | No         |                |                 |           |
| RC831        | TC0431::TnxL2/tetR-831             | CP042740  | 6/1/17         | L2/tet9   | UWCM007   | Cam/Tet     | 479046      | TC0431              | 555870       | 76824            | No         |                |                 |           |
| RC836        | TC0431::TnxL2/tetR-836             | CP042739  | 6/1/17         | L2/tet9   | UWCM007   | Cam/Tet     | 482983      | TC0431              | 555903       | 72920            | No         |                |                 |           |
| RC881        | TC0431::TnxL2/tetR-881             | CP042738  | 6/1/17         | L2/tet9   | UWCM007   | Cam/Tet     | 480000      | TC0431              | 555904       | 75904            | No         |                |                 |           |
| RC225        | TC0435::Tncl2/tetR-225             | CP042775  | 2/5/18         | L2/tet9   | UWCM015   | Cam/Tet     | 480181      | TC0435              | 555904       | 75723            | No         |                |                 |           |
| RC228        | TC0435::Tncl2/tetR-228             | CP042774  | 2/5/18         | L2/tet9   | UWCM015   | Cam/Tet     | 495831      | TC0435              | 555976       | 60145            | No         |                |                 |           |
| RC376        | TC0435::Tncl2/tetR-376             | CP042763  | 2/5/18         | L2/tet9   | UWCM015   | Cam/Tet     | 478851      | TC0435              | 555870       | 77019            | No         |                |                 |           |
| RC39         | TC0435::Tncl2/tetR-39              | CP042758  | 2/5/18         | L2/tet9   | UWCM015   | Cam/Tet     | 495831      | TC0435              | 555976       | 60145            | No         |                |                 |           |
| RC427        | TC0435::Tncl2/tetR-427             | CP042755  | 6/13/18        | L2/tet9   | UWCM015   | Cam/Tet     | 513519      | TC0435              | 556102       | 42583            | No         |                |                 |           |
| RC435        | TC0435::Tncl2/tetR-435             | CP042745  | 6/13/18        | L2/tet9   | UWCM015   | Cam/Tet     | 444250      | TC0435              | 555452       | 111202           | No         |                |                 |           |
| RC101        | TC0438::Tncl2/tetR-101             | CP042799  | 11/14/17       | L2/tet9   | UWCM023   | Cam/Tet     | 513672      | TC0438              | 556102       | 42430            | No         |                |                 |           |
| RC49         | TC0438::Tncl2/tetR-49              | CP042744  | 6/1/17         | L2/tet9   | UWCM023   | Cam/Tet     | 480472      | TC0438              | 555904       | 75432            | No         |                |                 |           |
| RC2415       | TC0530::Tncl2/tetR-2415            | CP042772  | 9/25/18        | L2/tet9   | UWCM030   | Cam/Tet     | 544186      | TC0530              | 597164       | 52978            | No         |                |                 |           |
| RC2435       | TC0530::Tncl2/tetR-2435            | CP042770  | 9/25/18        | L2/tet9   | UWCM030   | Cam/Tet     | 525682      | TC0530              | 596997       | 71315            | No         |                |                 |           |
| RC2457       | TC0530::Tncl2/tetR-2457            | CP042769  | 9/25/18        | L2/tet9   | UWCM030   | Cam/Tet     | 540935      | TC0530              | 616128       | 75193            | No         |                |                 |           |
| RC6041       | TC0575::Tncl2/tetR-6041            | CP042664  | 6/13/18        | L2/tet9   | UWCM011   | Cam/Tet     | 580584      | TC0575              | 622581       | 41997            | No         |                |                 |           |
| RC6088       | TC0575::Tncl2/tetR-6088            | CP042663  | 6/13/18        | L2/tet9   | UWCM011   | Cam/Tet     | 582220      | TC0575              | 622612       | 40392            | No         |                |                 |           |
| RC127        | TC0610::TnxL2/tetR-127             | CP042727  | 10/14/16       | L2/tet9   | UWCM004   | Cam/Tet     | 656663      | TC0610              | 692217       | 35554            | No         |                |                 |           |
| RC14         | TC0610::TnxL2/tetR-14              | CP042723  | 10/14/16       | L2/tet9   | UWCM004   | Cam/Tet     | 652079      | TC0610              | 693584       | 41505            | No         |                |                 |           |
| RC53         | TC0610::TnxL2/tetR-14xCM - 53      | CP042666  | 10/14/16       | L2/tet9   | UWCM004   | Cam/Tet     | 652071      | TC0610              | 693576       | 41505            | No         |                |                 |           |
| RC254        | TC0610::TnxL2/tetR-254             | CP042709  | 10/14/16       | L2/tet9   | UWCM004   | Cam/Tet     | 663738      | TC0610              | 695750       | 32012            | No         |                |                 |           |
| RC373        | TC0610::TnxL2/tetR-373             | CP042679  | 10/14/16       | L2/tet9   | UWCM004   | Cam/Tet     | 656663      | TC0610              | 692216       | 35553            | No         |                |                 |           |
| RC212        | TC0657::TnxL2/tetR-212             | CP042779  | 12/8/16        | L2/tet9   | UWCM002   | Cam/Tet     | 689434      | TC0657              | 751721       | 62287            | No         |                |                 |           |
| RC26         | TC0657::TnxL2/tetR-26              | CP042767  | 12/8/16        | L2/tet9   | UWCM002   | Cam/Tet     | 654863      | TC0657              | 752526       | 97663            | No         |                |                 |           |
| RC658        | TC0657::TnxL2/tetR-658             | CP042754  | 12/8/16        | L2/tet9   | UWCM002   | Cam/Tet     | 619061      | TC0657              | 744591       | 125530           | No         |                |                 |           |
| RC3509       | TC0693::Tncl2/tetR-3509            | CP042693  | 6/13/18        | L2/tet9   | UWCM012   | Cam/Tet     | 753750      | TC0693              | 788856       | 35106            | No         |                |                 |           |
| RC3543       | TC0693::Tncl2/tetR-3543            | CP042765  | 6/13/18        | L2/tet9   | UWCM012   | Cam/Tet     | 755693      | TC0693              | 804531       | 48838            | No         |                |                 |           |
| RC3572       | TC0693::Tncl2/tetR-3572            | CP042686  | 6/13/18        | L2/tet9   | UWCM012   | Cam/Tet     | 754362      | TC0693              | 788067       | 33705            | No         |                |                 |           |
| RC3580       | TC0693::Tncl2/tetR-3580            | CP042764  | 6/13/18        | L2/tet9   | UWCM012   | Cam/Tet     | 753297      | TC0693              | 812478       | 59181            | No         |                |                 |           |
| RC3583       | TC0693::Tncl2/tetR-3583            | CP042685  | 6/13/18        | L2/tet9   | UWCM012   | Cam/Tet     | 756129      | TC0693              | 787457       | 31328            | No         |                |                 |           |
| RC3750       | TC0693::Tncl2/tetR-3750            | CP042678  | 6/13/18        | L2/tet9   | UWCM012   | Cam/Tet     | 752727      | TC0693              | 787782       | 35055            | No         |                |                 |           |
| RC3767       | TC0693::Tncl2/tetR-3767            | CP042762  | 6/13/18        | L2/tet9   | UWCM012   | Cam/Tet     | 756074      | TC0693              | 814459       | 58385            | No         |                |                 |           |
| RC3772       | TC0693::Tncl2/tetR-3772            | CP042761  | 6/13/18        | L2/tet9   | UWCM012   | Cam/Tet     | 751627      | TC0693              | 810528       | 58901            | No         |                |                 |           |
| RC3837       | TC0693::Tncl2/tetR-3837            | CP042759  | 6/13/18        | L2/tet9   | UWCM012   | Cam/Tet     | 768764      | TC0693              | 813481       | 44717            | No         |                |                 |           |
| RC6801       | TC0693::Tncl2/tetR-6801            | CP042658  | 9/25/18        | L2/tet9   | UWCM012   | Cam/Tet     | 755910      | TC0693              | 800768       | 44858            | No         |                |                 |           |
| RC6833       | TC0693::Tncl2/tetR-6833            | CP042753  | 9/25/18        | L2/tet9   | UWCM012   | Cam/Tet     | 769874      | TC0693              | 803986       | 34112            | No         |                |                 |           |
| RC6882       | TC0693::Tncl2/tetR-6882            | CP042752  | 9/25/18        | L2/tet9   | UWCM012   | Cam/Tet     | 740559      | TC0693              | 815945       | 75386            | No         |                |                 |           |
| RC6903       | TC0693::Tncl2/tetR-6903            | CP042657  | 9/25/18        | L2/tet9   | UWCM012   | Cam/Tet     | 761620      | TC0693              | 786854       | 25234            | No         |                |                 |           |
| RC6936       | TC0693::Tncl2/tetR-6936            | CP042751  | 9/25/18        | L2/tet9   | UWCM012   | Cam/Tet     | 751832      | TC0693              | 814671       | 62839            | No         |                |                 |           |
| RC2180       | TC0743::Tncl2/tetR-2180            | CP042714  | 2/5/18         | L2/tet9   | UWCM017   | Cam/Tet     | 825751      | TC0743              | 879220       | 53469            | No         |                |                 |           |
| RC348        | TC0743::Tncl2/tetR-348             | CP042695  | 2/5/18         | L2/tet9   | UWCM017   | Cam/Tet     | 825982      | TC0743              | 885914       | 59932            | No         |                |                 |           |
| RC2104       | TC0828::Tncl2/tetR-2104            | CP042716  | 9/25/18        | L2/tet9   | UWCM032   | Cam/Tet     | 901847      | TC0828              | 904761       | 2914             | No         |                |                 |           |
| RC2246       | TC0828::Tncl2/tetR-2246            | CP042713  | 9/25/18        | L2/tet9   | UWCM032   | Cam/Tet     | 899710      | TC0828              | 906009       | 6299             | No         |                |                 |           |
| RC302        | TC0865-IGR-TC0866::Tncl2/tetR-302  | CP042704  | 11/14/17       | L2/tet9   | UWCM023   | Cam/Tet     | 929002      | TC0865-IGR-TC0866   | 983413       | 54411            | No         |                |                 |           |
| RC322        | TC0865-IGR-TC0866::Tncl2/tetR-322  | CP042700  | 11/14/17       | L2/tet9   | UWCM023   | Cam/Tet     | 928292      | TC0865-IGR-TC0866   | 983897       | 55605            | No         |                |                 |           |
| RC347        | TC0865-IGR-TC0866::Tncl2/tetR-347  | CP042696  | 11/14/17       | L2/tet9   | UWCM023   | Cam/Tet     | 926777      | TC0865-IGR-TC0866   | 949715       | 22938            | No         |                |                 |           |
| RC412        | TC0865-IGR-TC0866::Tncl2/tetR-412  | CP042674  | 11/14/17       | L2/tet9   | UWCM023   | Cam/Tet     | 928704      | TC0865-IGR-TC0866   | 945950       | 17246            | No         |                |                 |           |
| RC499        | TC0865-IGR-TC0866::Tncl2/tetR-499  | CP042667  | 11/14/17       | L2/tet9   | UWCM023   | Cam/Tet     | 931201      | TC0865-IGR-TC0866   | 978514       | 47313            | No         |                |                 |           |
| RC222        | TC0878::TnxL2/tetR-222             | CP042777  | 10/14/16       | L2/tet9   | UWCM005   | Cam/Tet     | 187411      | TC0878              | 127224       | 60188            | No         |                |                 |           |
| RC336        | TC0878::TnxL2/tetR-336             | CP042698  | 10/14/16       | L2/tet9   | UWCM005   | Cam/Tet     | 956110      | TC0878              | 1017230      | 11904            | No         |                |                 |           |
| RC6309       | TC0913-IGR-TC0914::Tncl2/tetR-6309 | CP042662  | 6/13/18        | L2/tet9   | UWCM018   | Cam/Tet     | 991508      | TC0913-IGR-TC0914   | 1010193      | 18685            | No         |                |                 |           |
| RC6353       | TC0913-IGR-TC0914::Tncl2/tetR-6353 | CP042661  | 6/13/18        | L2/tet9   | UWCM018   | Cam/Tet     | 992139      | TC0913-IGR-TC0914   | 1017239      | 25100            | No         |                |                 |           |
| RC6362       | TC0913-IGR-TC0914::Tncl2/tetR-6362 | CP042660  | 6/13/18        | L2/tet9   | UWCM018   | Cam/Tet     | 992835      | TC0913-IGR-TC0914   | 1013927      | 21092            | No         |                |                 |           |
| RC6389       | TC0913-IGR-TC0914::Tncl2/tetR-6389 | CP042659  | 6/13/18        | L2/tet9   | UWCM018   | Cam/Tet     | 991008      | TC0913-IGR-TC0914   | 1010846      | 19838            | No         |                |                 |           |
| RC936        | TC0350::Tncl2/tetR-936             | CP042803  | 3/15/19        | L2/tet9   | UWCM013   | Cam/Tet     | 620703      | CTL0506-IGR-CTL0507 | 622705       | 2002             | No         |                |                 |           |

**Table S2.** Progeny data for crosses of either single *C. muridarum* and *C. trachomatis* parents, versus crosses with multiple *C. muridarum* parents and a single *C. trachomatis* parent. The total number of each clone in the cross is indicated (#), and the average length of recombined fragments for each clone is determined for each cross.

| <b>Multiple Parent Crosses</b>          |                     |                 |                     |                 |
|-----------------------------------------|---------------------|-----------------|---------------------|-----------------|
| <b>L2tet9 x (CM009 + CM017 + CM020)</b> |                     |                 |                     |                 |
|                                         | <b>Experiment 1</b> |                 | <b>Experiment 2</b> |                 |
|                                         | #                   | Length          | #                   | Length          |
| L2tet9 x CM009                          | 0                   |                 | 5                   | 34,577 ± 19,786 |
| L2tet9 x CM017                          | 0                   |                 | 0                   |                 |
| L2tet9 x CM020                          | 7                   | 6,614 ± 2,499   | 3                   | 5,726 ± 4,484   |
| <b>L2tet9 x (CM012 + CM013 + CM026)</b> |                     |                 |                     |                 |
| L2tet9 x CM012                          | 12                  | 36,151 ± 9,950  | 6                   | 49,932 ± 20,230 |
| L2tet9 x CM013                          | 0                   |                 | 0                   |                 |
| L2tet9 x CM026                          | 1                   | 28,560          | 0                   |                 |
| <b>Single Parent Crosses</b>            |                     |                 |                     |                 |
| L2tet9 x CM009                          | 8                   | 10,823 ± 10,167 |                     |                 |
| L2tet9 x CM017                          | 2                   | 54,701 ± 4,570  |                     |                 |
| L2tet9 x CM020                          | 5                   | 9,464 ± 9,203   |                     |                 |
| L2tet9 x CM012                          | 4                   | 45,525 ± 12,886 |                     |                 |
| L2tet9 x CM013                          | 0                   |                 |                     |                 |
| L2tet9 x CM026                          | 5                   | 23,163 ± 15,042 |                     |                 |

**Table S3.** Accession numbers for genomes used in the comparison of different chromosomal replication termination sites in Figure 7.

| <b>Strain</b>                          | <b>Accession Number</b> |
|----------------------------------------|-------------------------|
| <i>C. trachomatis</i> D/UW-3/CX        | AE001273.1              |
| <i>C. trachomatis</i> L2-434           | CP019386.1              |
| <i>C. muridarum</i> VR-123             | AE002160.2              |
| <i>C. suis</i> SWA-2                   | LT821323.1              |
| <i>C. pneumoniae</i> CWL029            | AE001363.1              |
| <i>C. avium</i> 10DC88                 | CP006571.1              |
| <i>C. caviae</i> GPIC                  | AE015925.1              |
| <i>C. abortus</i> S26/3                | CR848038.1              |
| <i>C. felis</i> Fe/C-56                | AP006861.1              |
| <i>C. gallinacea</i> JX-1              | CP019792.1              |
| <i>C. psittaci</i> RD1                 | FQ482149.1              |
| <i>C. pecorum</i> P787                 | CP004035.1              |
| <i>Waddlia chondrophila</i>            | FR872653.1              |
| <i>Parachlamydia acanthamoebae</i> Bn9 | NZ_BAWW01000066.1       |
| <i>E. coli</i> O157                    | BA000007.2              |
